# Supplementary material for: Assembly of a calix[4]arene-supported MnIIIMnIIcluster mediated by halogen interactions
Source: Royal Society of Chemistry journal article supplement (doi:10.1039/c4ce00729h), 2014-01-01
Supplement: c4ce00729h1.pdf [file c4ce00729h1.pdf]

## Supporting Information

Stephanie M. Taylor,<sup>a</sup> Jamie M. Frost,<sup>a</sup> Ross McLellan,<sup>b</sup> Ruaraidh D. McIntosh,<sup>b</sup>  
Euan K. Brechin<sup>a\*</sup> and Scott J. Dalgarno<sup>b\*</sup>

- Additional figures relating to the magnetic data for **1**.

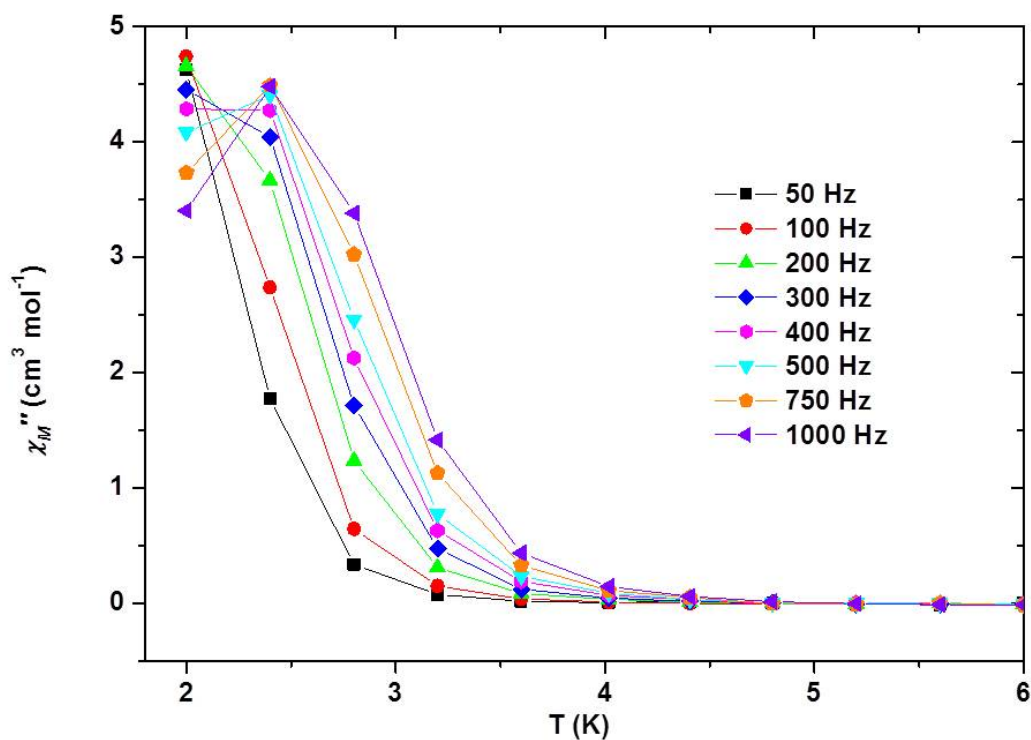

**Figure S1.** Out-of-phase ac susceptibility plot of  $\chi_M''$  versus  $T$  for complex **1** in the 2 – 6 K temperature range, and the indicated frequencies.

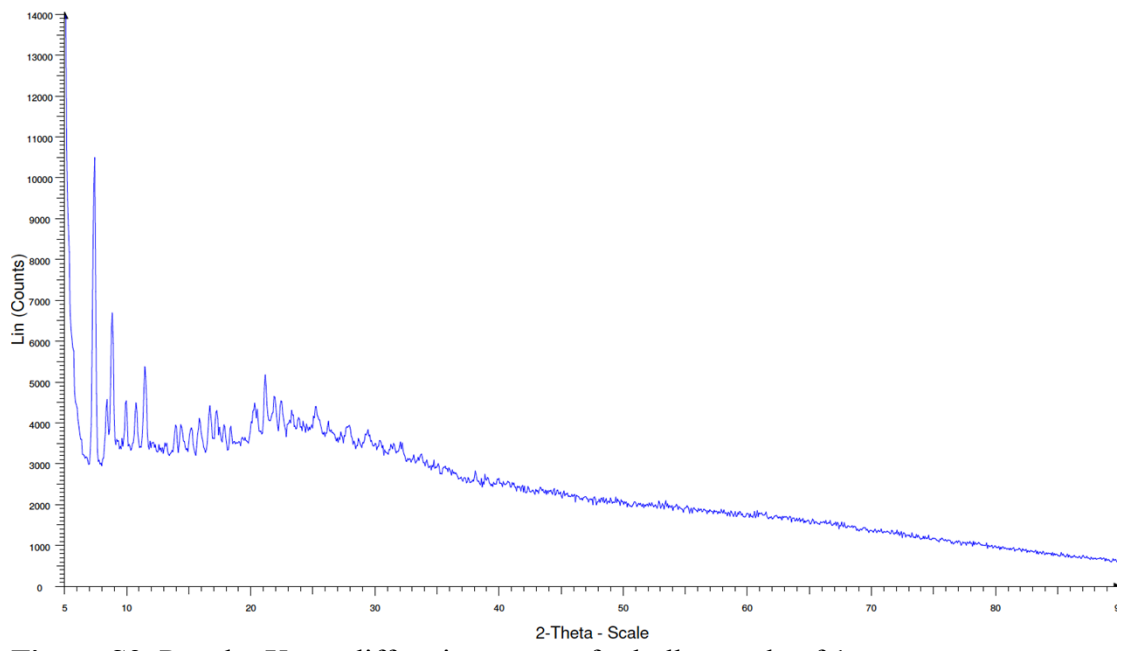

**Figure S2.** Powder X-ray diffraction pattern for bulk sample of **1**.
